# Supplementary material for: Solution-phase oligosaccharide synthesis in a cycloalkane-based thermomorphic system
Source: Royal Society of Chemistry journal article supplement (doi:10.1039/b717446b), 2008-01-01

# Solution-Phase Oligosaccharide Synthesis in a Cycloalkane-Based Thermomorphic System

*Shokaku Kim<sup>a</sup>, Ai Tsuruyama<sup>b</sup>, Akihiro Ohmori<sup>b</sup>, and Kazuhiro Chiba<sup>a\*</sup>*

<sup>a</sup> Laboratory of Bio-organic Chemistry, Tokyo University of Agriculture and Technology, 3-5-8 Saiwai-cho, Fuchu, Tokyo 183-8509, Japan, <sup>b</sup> Yokohama Technical Center, Moritex Corporation. 1-3-3 Azamino-Minami, Aoba-ku, Yokohama, Kanagawa 225-0012, Japan

[Email\\_chiba@cc.tuat.ac.jp](mailto:Email_chiba@cc.tuat.ac.jp)

## Table of Contents.

|                           |      |
|---------------------------|------|
| 1. General information    | S-1  |
| 2. Experimental procedure | S-2  |
| 3. HPLC analysis          | S-8  |
| 4. NMR spectra            | S-10 |

## 1. General Information.

<sup>1</sup>H and <sup>13</sup>C NMR spectra were recorded in CDCl<sub>3</sub> with TMS as the initial standard on JEOL JNM-LA400 spectrometer. The following abbreviations were used to explain multiplicities: s, singlet; d, doublet; t, triplet; m, multiple. TLC analysis was carried out with Merk Silica Gel 60 F254 plates, detection of compounds was achieved by UV absorption (254 nm) and by charring after spraying with ceric ammonium sulfate in 10% aqueous H<sub>2</sub>SO<sub>4</sub>. Column chromatography was performed with Kieselgel 60 Silica Gel (Merk, 0.04-0.063 mm). All reagents and solvents were purchased from Kanto

chemical, Tokyo Kasei Kogyo, Aldrich and Wako and used as received. High-performance liquid chromatography (HPLC) was carried out using a JASCO LC 2000 series, PU-2080 plus Intelligent HPLC pump, MX-2080-53 3-Line degasser, MS-2080-31 Solvent Mixing Module, UV-2075 Plus Intelligent UV/ VIS detector with Imtakt Unison UK silica UKS06 (normal phase; 130A, 3  $\mu$ m, 250  $\times$  4.6 mm). Mass spectra were measured using an Applied Biosystems Japan., Ltd. Voyager DE-STR /NT-O MALDI-TOF with  $\alpha$ -cyano-4-hydroxycinnamic acid as the matrix.

**Typical Glycosylation Procedure.** To a solution of acceptor (0.1-0.3 mmol) in methylcyclohexane (4 ml) was added flame-dried MS AW-300 (0.3 g) and a solution of the trichloroacetamide donor (2.0 equiv) in propionitrile (2 ml). After stirring for 1 h at room temperature, the mixture was treated with 0.5 equiv of TMSOTf. After stirring for 30 min at 25  $^{\circ}$ C, the homogenous reaction mixture was neutralized with triethylamine followed by addition of acetonitrile (2 ml) and partitioned between nitriles (EtCN/MeCN=1/1 v/v) and MCH ( $\times$  3) at 25  $^{\circ}$ C. The combined MCH layers were concentrated and precipitated with MeOH to give the corresponding oligosaccharide.

**Typical procedure of TBDPS protecting group.** A solution of TBDPS-protected compound in MCH/EtCN (2/1, v/v, 30 ml) was treated with acetic acid (6.0 equiv) and tetrabutylammoniumfluoride 1.0 M solution in THF (3.0 equiv). After stirring for 10 h at room temperature, the reaction mixture was added to MeCN (10 ml) to form a biphasic-solution at room temperature. The reaction mixture was extracted with MCH three times. The combined MCH layers were concentrated, and precipitated with MeOH to give the deprotected oligosaccharide derivative.

## 2. Experimental procedure

### Methyl 2,3,4-tri-*O*-octadecanoyl- $\alpha$ -D-glucopyranoside (1).

$\alpha$ -D-methylglucoside (89.0 g, 0.46 mol) in anhydride  $\text{CH}_2\text{Cl}_2$  (600 ml) was treated with triethylamine (196 ml, 1.4 mol), 4-dimethylaminopyridine (DMAP, 4.38 g, 0.036 mol) and trityl chloride (100 g, 0.35 mol). After stirring for 2 days at room temperature, the reaction mixture was poured into  $\text{H}_2\text{O}$  (200 ml) and washed three times. The organic layer was dried with  $\text{MgSO}_4$ , concentrated to a minimal volume

and precipitated with MeOH to give methyl 6-*O*-trityl- $\alpha$ -D-glucoside (73.3 g, 48 %). A solution of 6-trityl- $\alpha$ -D-methylglucoside (72.4 g, 0.166 mol) in CH<sub>2</sub>Cl<sub>2</sub> (1 L) was added to triethylamine (463 ml, 3.32 mol) and DMAP (2.1 g, 0.017 mol), then cooled on ice. Stearoyl chloride (300 g, 0.99 mol) was added dropwise at 0 °C for 30 min and stirred over night at room temperature. The reaction mixture was filtered in vacuo and washed with n-hexane (200 ml). The filtrate was concentrated and precipitated with 2-propanol to give desired product (164 g, 80%). A solution of 2,3,4-tri-*O*-octadecanoyl- 1-methoxy-6-trityl- $\alpha$ -D-glucopyranoside (40.9 g, 0.032 mol) and triisopropylsilane (18.07 g, 0.114 mol) in CH<sub>2</sub>Cl<sub>2</sub> (500 ml) was stirred at 0 °C. Trifluoroacetic acid (TFA, 11.64 g, 0.102 mol) was added dropwise for 30 min. After stirring for 2 h at 0 °C, the reaction mixture was concentrated and diluted in n-hexane (200 ml). The residue was washed with DMF (100 ml  $\times$  2), MeCN (100 ml  $\times$  3). n-Hexane layer was concentrated and precipitated with 2-propanol to give compound **1** (31 g, 95 %); <sup>1</sup>H-NMR(400MHz, CDCl<sub>3</sub>)  $\delta$ 5.57 (1H, t, *J*=9.76 Hz), 5.00 (1H, t, *J*=9.76 Hz), 4.96 (1H, d, *J*=3.66 Hz), 4.86 (1H, dd, *J*=10.02, 3.66 Hz), 3.78-3.67 (2H, m), 3.60-3.54 (1H, m), 3.40 (3H, s), 2.40-2.18 (6H, m), 1.63-1.46 (6H, m), 1.25 (84H, m), 0.88 (9H, t, *J*=6.83 Hz); <sup>13</sup>C-NMR(100MHz, CDCl<sub>3</sub>)  $\delta$ 173.4, 172.9, 172.4, 96.8, 70.9, 69.3, 69.2, 68.7, 61.1, 55.4, 34.3, 34.2, 34.1, 31.9, 29.8, 29.8, 29.7, 29.7, 29.6, 29.6, 29.5, 29.4, 29.4, 29.3, 29.3, 29.2, 29.2, 29.1, 25.1, 25.0, 24.9, 22.8, 14.2. MALDI-TOF-MS: *m/z* calcd. for C<sub>61</sub>H<sub>116</sub>NaO<sub>9</sub> (M+Na<sup>+</sup>): 1016.85, Found: 1015.73.

**Solubility measurement of hydrophobic monosaccharide in various solvents.** Compound **1** was dissolved to each solution (6 ml) in excess quantity of saturated concentration at 25 °C. After the solution was heated to 55 °C for 15 min to solve compound **1**, the solution was cooled down to 25 °C. After more than 2 h at 25 °C, the insoluble compound **1** was filtered out with PTFE filter (0.2  $\mu$ m). The filtrate was concentrated and evaporated in vacuo. The solubility of compound **1** was calculated by weight of the residue.

***O*-2,3,4-tri-*O*-benzoyl-6-*O*-*t*-butyldiphenylsilyl- $\alpha$ -D-glucopyranosyl trichloroacetimidate (**2**).**

This journal is (c) The Royal Society of Chemistry 2008

A solution of phenyl 2,3,4-tri-*O*-benzoyl-6-(*t*-butyldiphenylsilyl)-1-thio- $\alpha$ -D-glucopyranoside (2.0g, 2.43 mmol) in acetone-H<sub>2</sub>O (9:1, v/v, 30 ml) was treated with N-bromosuccinimide (1.75 g, 9.72 mmol) at 25 °C. The reaction mixture was stirred for 2 h at 25 °C, concentrated and purified by flash chromatography (hexane-EtOAc=4:1) to give Phenyl *S*-2, 3, 4-tri-*O*-benzoyl-6-*t*-butyldiphenylsilyl-1-thio- $\alpha$ -D-glucopyranoside (1.36 g, 77.5%). This compound (1.0 g, 1.68 mmol) in CH<sub>2</sub>Cl<sub>2</sub> (5 ml) was treated with trichloroacetonitrile (0.86 g, 5.47 mmol) and DBU (0.21 g, 1.36 mmol). The reaction mixture was stirred for 16 h at 25 °C, concentrated and purified by flash chromatography (0.2% TEA hexane-EtOAc, 6:1) to give compound 3 (0.78 g, 65.5%); <sup>1</sup>H-NMR(400MHz, CDCl<sub>3</sub>)  $\delta$ 8.57 (1H, s), 7.96-7.85 (6H, m), 7.66-7.15 (19H, m), 6.86 (1H, d, *J*=3.4 Hz), 6.20 (1H, t, *J*=10.0 Hz), 5.8 (1H, t, *J*=9.77 Hz), 4.38 (1H, m), 3.85 (2H, d, *J*=3.42 Hz), 3.66 (1H, dd, *J*=10.24, 3.66 Hz), 1.02 (9H, s); <sup>13</sup>C-NMR(100MHz, CDCl<sub>3</sub>)  $\delta$ 165.6, 165.4, 164.9, 160.4, 135.5, 132.8, 132.8, 129.9, 129.9, 129.7, 129.6, 129.0, 128.6, 128.3, 127.6, 127.5, 90.9, 73.5, 62.3, 26.7, 26.7, 19.2. MALDI-TOF-MS: *m/z* calcd. for C<sub>45</sub>H<sub>42</sub>NNaO<sub>9</sub>Si (M+Na<sup>+</sup>): 896.16, Found: 896.10.

**Methyl *O*-(2,3,4-tri-*O*-benzoyl-6-*O*-*t*-butyldiphenylsilyl- $\beta$ -D-glucopyranosyl)-(1 $\rightarrow$ 6)-2,3,4-tri-*O*-octadecanoyl- $\beta$ -D-glucopyranoside (3a).**

To a solution of compound 1 (0.3 g, 0.3 mmol) in MCH (4 ml) was added flame-dried MS AW-300 (0.3 g) and a solution of compound 2 (0.53 g, 0.6 mmol) in EtCN (2 ml). After stirred for 1h at room temperature, the mixture was treated with TMSOTf (29  $\mu$ l, 0.15 mmol). After stirring for 30 min at 25 °C, the homogenous reaction mixture was neutralized with Et<sub>3</sub>N followed by addition of MeCN (2 ml) and partitioned between nitriles (EtCN/MeCN=1/1 v/v) and MCH ( $\times$  3). The combined MCH layers were concentrated and precipitated with MeOH to give compound 3a (0.49 g, 97% yield; 95% purity) as a white powder; <sup>1</sup>H-NMR(400MHz, CDCl<sub>3</sub>)  $\delta$ 7.94(2H, dd, *J*=7.08, 8.55 Hz), 7.88-7.80(4H, m), 7.68(2H, dd, *J*=7.81, 9.28 Hz), 7.58(2H, dd, *J*=8.06, 9.28 Hz), 7.56-7.46(2H, m), 7.44-7.24(11H, m), 7.21(2H, t, *J*=7.57 Hz), 5.84 (1H, t, *J*=9.77 Hz), 5.63(1H, t, *J*=9.52 Hz), 5.51(1H, dd, *J*=7.81, 9.77 Hz),

This journal is (c) The Royal Society of Chemistry 2008

5.43 (1H, t,  $J=9.77$  Hz), 4.87 (1H, d,  $J=7.81$  Hz), 4.81(1H, t,  $J=10.25$  Hz), 4.70 (1H, dd,  $J=3.66, 10.20$  Hz), 4.64 (1H, d,  $J=3.66$  Hz), 3.97-3.90 (2H, m), 3.85 (1H, s), 3.63-3.58 (1H, m), 2.32-2.13 (6H, m), 1.62-1.43 (6H, m), 1.25(84H, m), 1.03(9H, s), 0.88 (9H, t,  $J=6.84$  Hz);  $^{13}\text{C-NMR}$  (100MHz,  $\text{CDCl}_3$ )  $\delta$ 172.7, 172.3, 172.2, 165.7, 164.9, 164.7, 135.4, 135.3, 133.0, 132.9, 132.8, 132.8, 129.6, 129.6, 129.5, 129.4, 129.2, 129.0, 128.8, 128.2, 128.1, 127.5, 127.4, 101.4, 96.0, 75.1, 73.1, 71.9, 69.5, 69.1, 68.8, 68.4, 68.3, 62.5, 54.6, 34.1, 34.0, 33.9, 31.9, 30.0, 29.6, 29.5, 29.5, 29.3, 29.3, 29.2, 29.2, 29.1, 29.0, 26.6, 24.9, 24.8, 24.7, 22.7, 19.1, 14.1 MALDI-TOF-MS:  $m/z$  calcd. for  $\text{C}_{104}\text{H}_{156}\text{NaO}_{17}\text{Si}$  ( $\text{M}+\text{Na}^+$ ): 1728.10, Found: 1728.71.

**Methyl *O*-(2,3,4-tri-*O*-benzoyl- $\beta$ -D-glucopyranosyl)-(1 $\rightarrow$ 6)-2,3,4-tri-*O*-octadecanoyl- $\alpha$ -D-glucopyranoside (4a).**

A solution of compound **3a** (0.6 g, 0.35 mmol) in MCH/EtCN (2/1, v/v, 30 ml) was treated with acetic acid (0.12 g, 2.00 mmol) and tetrabutylammoniumfluoride 1.0 M solution in THF (TBAF, 1.00 ml, 1.00 mmol) at room temperature. After stirring for 12 h, MeCN (10 ml) was added to formed biphasic solution at room temperature. The reaction mixture was extracted with MCH three times. The combined MCH layers were concentrated and precipitated with MeOH to give compound **4a** (0.48 g, 93%) as a white powder;  $^1\text{H-NMR}$ (400MHz,  $\text{CDCl}_3$ )  $\delta$ 7.98-7.91(4H, m), 7.82(2H, dd,  $J=8.30, 9.52$  Hz), 7.57-7.47(2H, m), 7.45-7.33(5H, m), 7.27(2H, t,  $J=7.81$  Hz), 5.93 (1H, t,  $J=9.77$  Hz), 5.51(1H, dd,  $J=9.77, 7.81$  Hz), 5.47 (1H, t,  $J=9.52$  Hz), 5.43 (1H, t,  $J=9.77$  Hz), 4.91 (1H, d,  $J=7.81$  Hz), 4.87 (1H, t,  $J=9.52$  Hz), 4.72 (1H, dd,  $J=3.66, 10.25$  Hz), 4.65 (1H, d,  $J=3.66$  Hz), 3.96-3.84 (3H, m), 3.81-3.70 (2H, m), 3.64 (1H, dd,  $J=7.08, 10.98$  Hz), 3.03 (3H, s), 2.28-2.14 (6H, m), 1.61-1.45 (6H, m), 1.25 (84H, m), 0.88 (9H,t,  $J=6.84$  Hz);  $^{13}\text{C-NMR}$ (100MHz,  $\text{CDCl}_3$ )  $\delta$ 172.8, 172.7, 172.4, 166.0, 165.6, 164.9, 133.6, 133.2, 129.9, 129.8, 129.8, 129.8, 129.7, 129.6, 129.2, 128.7, 128.4, 128.2, 101.0, 96.1, 74.8, 72.8, 72.5, 71.7, 71.3, 70.8, 70.0, 69.5, 69.3, 68.8, 68.3, 61.2, 54.9, 34.2, 34.2, 34.1, 32.0, 29.8, 29.7, 29.4, 29.2, 29.1, 25.0, 24.9, 24.8, 22.8, 14.1; MALDI-TOF-MS:  $m/z$  calcd. for  $\text{C}_{88}\text{H}_{138}\text{NaO}_{17}$  ( $\text{M}+\text{Na}^+$ ): 1489.98, Found: 1489.77.

**Methyl *O*-(2,3,4-tri-*O*-benzoyl-6-*O*-*t*-butyldiphenylsilyl- $\beta$ -D-glucopyranosyl)-(1 $\rightarrow$ 6)-(2,3,4-tri-*O*-benzoyl- $\beta$ -D-glucopyranosyl)-(1 $\rightarrow$ 6)-2,3,4-tri-*O*-octadecanoyl- $\alpha$ -D-glucopyranoside (3b).**

Compound **4a** (0.3 g, 0.20 mmol) and compound **2** (0.4 g, 0.46 mmol) were coupled by the same procedure as described in the synthesis of disaccharide derivatives to give trisaccharide derivative **3b** as a white powder (0.38 g, 86% yield; 90% purity);  $^1\text{H-NMR}$ (400MHz,  $\text{CDCl}_3$ )  $\delta$ 8.01-7.92 (4H, m), 7.89-7.78(6H, m), 7.75(2H, dd,  $J=8.29$ , 1.22 Hz), 7.65-7.61(2H, m), 7.55-7.47(6H, m), 7.46-7.30(12H, m), 7.29-7.21(6H, m), 7.16(2H, t,  $J=7.56$  Hz), 5.84 (1H, t,  $J=9.76$  Hz), 5.80 (1H, t,  $J=9.76$  Hz), 5.61 (1H, t,  $J=9.27$  Hz), 5.44 (1H, dd,  $J=9.51$ , 8.05 Hz), 5.373 (1H, t,  $J=9.76$  Hz), 5.32 (1H, t,  $J=9.76$  Hz), 4.91 (1H, d,  $J=8.05$  Hz), 4.81 (1H, t,  $J=9.76$  Hz), 4.70 (1H, d,  $J=3.66$  Hz), 4.67 (1H, d,  $J=7.81$  Hz), 4.59 (1H, dd,  $J=10.25$ , 3.66 Hz), 4.16-3.91 (2H, m), 3.86-3.72 (5H, m), 3.62-3.58 (1H, m), 3.28-3.22 (1H, dd,  $J=5.37$ , 11.47 Hz), 3.11 (3H, s), 2.29-2.06 (6H, m), 1.64-1.41 (6H, m), 1.26-1.11 (84H, m), 0.98 (9H, s), 0.88 (9H, t,  $J=6.84$  Hz);  $^{13}\text{C-NMR}$ (100MHz,  $\text{CDCl}_3$ )  $\delta$ 172.6, 172.4, 172.1, 165.7, 165.5, 165.1, 164.9, 164.9, 164.8, 135.6, 135.5, 135.4, 135.4, 133.6, 133.3, 133.0, 133.0, 132.9, 132.8, 132.6, 130.0, 129.9, 129.8, 129.8, 129.7, 129.7, 129.5, 129.4, 129.3, 129.1, 129.0, 128.9, 128.8, 128.8, 128.7, 128.3, 128.2, 128.1, 127.7, 127.5, 127.5, 101.3, 96.3, 91.0, 75.1, 73.9, 73.2, 72.9, 72.1, 71.8, 70.7, 70.4, 70.1, 69.9, 69.5, 69.0, 68.6, 68.2, 67.8, 63.8, 62.6, 55.1, 34.3, 34.2, 34.1, 34.1, 32.0, 30.4, 29.8, 29.8, 29.7, 29.6, 29.6, 29.6, 29.4, 29.3, 29.3, 29.1, 26.6, 25.0, 25.0, 24.9, 22.8, 19.1, 14.2 MALDI-TOF-MS:  $m/z$  calcd. for  $\text{C}_{131}\text{H}_{178}\text{NaO}_{25}\text{Si}$  ( $\text{M}+\text{Na}^+$ ): 2202.23 Found: 2202.74.

**Methyl *O*-(2,3,4-tri-*O*-benzoyl- $\beta$ -D-glucopyranosyl)-(1 $\rightarrow$ 6)-(2,3,4-tri-*O*-benzoyl- $\beta$ -D-glucopyranosyl)-(1 $\rightarrow$ 6)-2,3,4-tri-*O*-octadecanoyl- $\alpha$ -D-glucopyranoside (4b).**

Compound **3b** (0.24 g, 0.11 mmol) were deprotected by the same procedure as described in the deprotection procedure of TBDPS group to give compound **4b** as a colorless powder (0.17 g, 90%);  $^1\text{H-NMR}$ (400MHz,  $\text{CDCl}_3$ )  $\delta$ 7.98-7.87 (8H, m), 7.82-7.74 (4H, m), 7.60-7.31 (14H, m), 7.30-7.23 (4H, m), 5.86 (1H, t,  $J=9.76$  Hz), 5.80 (1H, t,  $J=9.76$  Hz), 5.60 (1H, t,  $J=9.52$  Hz), 5.41 (1H, dd,  $J=9.76$ , 7.81

Hz), 5.39 (1H, t,  $J=9.52$  Hz), 5.31(1H, dd,  $J=9.76$ , 7.81 Hz), 5.26 (1H, t,  $J=9.76$  Hz), 4.91 (1H, d,  $J=7.81$  Hz), 4.82 (1H, t,  $J=9.76$  Hz), 4.75 (1H, d,  $J=7.81$  Hz), 4.68-4.66 (1H, m), 4.64 (1H, d,  $J=3.66$  Hz), 4.11 (1H, dd,  $J=10.74$ , 3.66 Hz), 3.99-3.94 (1H, m), 3.89 (1H, dd,  $J=10.74$ , 5.37 Hz), 3.83-3.70 (4H, m), 3.64-3.54 (1H, m), 3.43 (1H, dd,  $J=11.23$ , 6.59 Hz), 3.06 (3H, s), 2.96-2.86(1H, m), 2.32-2.10 (6H, m), 1.65-1.42 (6H, m), 1.32-1.15 (84H, m), 0.89 (9H, t,  $J=6.84$  Hz);  $^{13}\text{C-NMR}$ (100MHz,  $\text{CDCl}_3$ )  $\delta$ 172.8, 172.5, 172.5, 165.8, 165.7, 165.7, 165.0, 165.0, 133.6, 133.2, 133.1, 130.0, 129.9, 129.8, 129.7, 129.4, 129.3, 129.0, 128.9, 128.7, 128.6, 128.4, 128.4, 128.3, 101.4, 100.6, 96.3, 74.7, 73.2, 72.8, 71.8, 71.6, 70.7, 70.5, 69.5, 69.3, 68.9, 68.4, 68.3, 68.0, 61.2, 55.0, 34.2, 34.1, 31.9, 29.7, 29.7, 29.7, 29.6, 29.5, 29.4, 29.3, 29.2, 29.1, 24.9, 24.9, 24.8, 22.7, 14.1 MALDI-TOF-MS:  $m/z$  calcd. for  $\text{C}_{115}\text{H}_{160}\text{NaO}_{25}$  ( $\text{M}+\text{Na}^+$ ): 1964.11, Found: 1964.59.

**Methyl *O*-(2,3,4-tri-*O*-benzoyl-6-*O*-*t*-butyldiphenylsilyl- $\beta$ -D-glucopyranosyl)-(1 $\rightarrow$ 6)-(2,3,4-tri-*O*-benzoyl- $\beta$ -D-glucopyranosyl)-(1 $\rightarrow$ 6)-(2,3,4-tri-*O*-benzoyl- $\beta$ -D-glucopyranosyl)-(1 $\rightarrow$ 6)-2,3,4-tri-*O*-octadecanoyl- $\alpha$ -D-glucopyranoside (3c).**

Compound **4b** (0.13g, 0.07mmol) and compound **2** (0.15 g, 0.17 mmol) were coupled by the same procedure as described in the synthesis of disaccharide derivatives to give compound **3c** as a white powder (0.16 g, 86% yield; 93% purity);  $^1\text{H-NMR}$ (400MHz,  $\text{CDCl}_3$ )  $\delta$ 8.06(2H, dd,  $J=7.08$ , 8.30 Hz), 8.00-7.85(8H, m), 7.82-7.73(6H, m), 7.72-7.66(2H, m), 7.61-7.13(37H, m), 6.01 (1H, d,  $J=5.37$  Hz), 5.79 (1H, t,  $J=9.52$  Hz), 5.78 (1H, t,  $J=9.52$  Hz), 5.60-5.55 (2H, m), 5.48 (1H, d,  $J=8.78$  Hz), 5.43-5.27 (4H, m), 4.86 (1H, d,  $J=7.81$  Hz), 4.82 (1H, t,  $J=9.76$  Hz), 4.69 (1H, d,  $J=3.66$  Hz), 4.66 (1H, d,  $J=7.81$  Hz), 4.60 (1H, dd,  $J=10.01$ , 3.66 Hz), 4.57- 4.55 (1H, m), 4.06-4.01 (1H, m), 3.98-3.89 (1H, m), 3.84-3.58 (7H, m), 3.52-3.40 (2H, m), 3.28 (1H, dd,  $J=11.24$ , 5.37 Hz), 3.10 (3H, s), 2.30-2.05 (6H, m), 1.60-1.42 (6H, m), 1.32-1.14 (84H, m), 0.93 (9H, s), 0.88 (9H, t,  $J=6.84$  Hz);  $^{13}\text{C-NMR}$ (100MHz,  $\text{CDCl}_3$ )  $\delta$ 172.5, 172.3, 172.1, 165.5, 165.4, 165.1, 164.9, 164.8, 164.8, 164.7, 164.2, 163.1, 135.4, 135.3, 134.3, 133.3, 133.2, 133.1, 133.0, 132.9, 132.9, 132.8, 132.8, 130.0, 129.8, 129.7, 129.7, 129.6, 129.5, 129.5, 129.4, 129.3, 129.2, 129.2, 129.1, 128.7, 128.7, 128.7, 128.6, 128.3, 128.2, 128.1, 128.0, S-7

This journal is (c) The Royal Society of Chemistry 2008

128.0, 127.4, 127.3, 126.4, 120.7, 101.1, 101.0, 97.8, 96.2, 77.1, 73.8, 72.9, 72.6, 72.6, 71.8, 71.7, 70.6, 69.8, 69.4, 69.2, 68.5, 68.1, 67.8, 67.7, 63.3, 62.5, 55.0, 34.1, 34.0, 34.0, 31.9, 29.7, 29.7, 29.6, 29.6, 29.5, 29.5, 29.3, 29.3, 29.2, 29.2, 29.0, 26.6, 24.9, 24.9, 24.8, 22.7, 19.1, 14.1 MALDI-TOF-MS:  $m/z$  calcd. for  $C_{158}H_{200}NaO_{33}Si$  ( $M+Na^+$ ): 2676.36, Found: 2676.44.

### 3. HPLC analysis

Purity of compound **3a-c** produced by CBT synthesis was analyzed by HPLC. Each compound which obtained precipitated with MeOH was analyzed by using Imtakt Unison UK silica UKS06 (250×4.6 mm) with a flow rate of 1mL/min, monitoring by UV at 280 nm. The initial conditions were 95% n-Hexane / 5% Ethyl acetate with a linear gradient to 80% n-Hexane / 20% Ethyl acetate (compound **3c**; 75% n-Hexane / 25% Ethyl acetate) in 25 min. The solvent composition was held at these final conditions for 15 min.

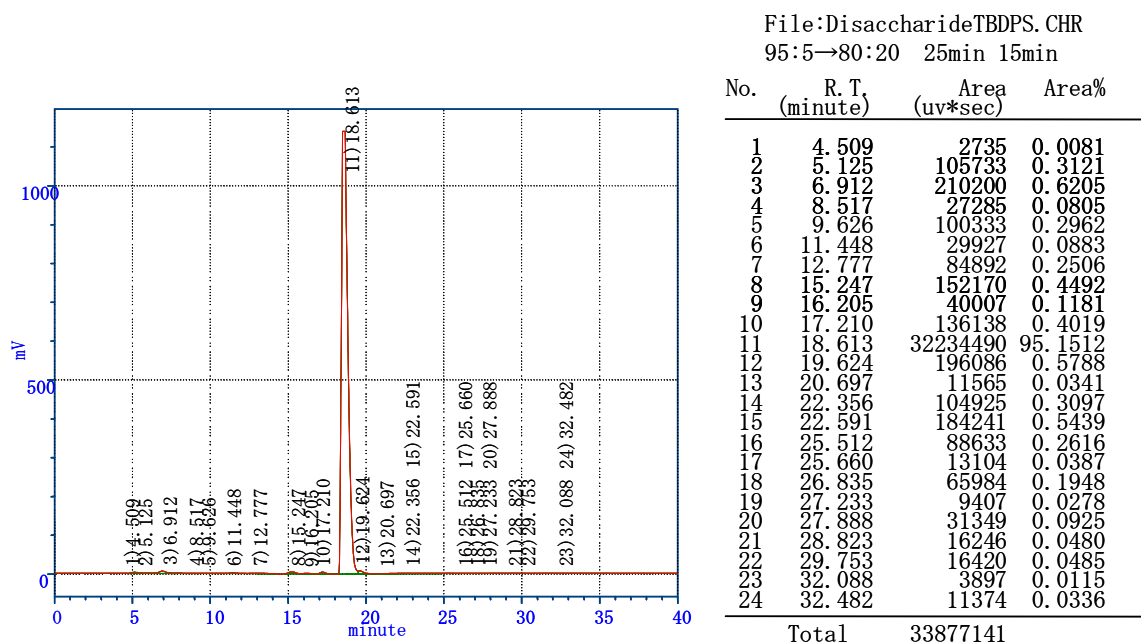Fig.1 HPLC profile of compound **3a**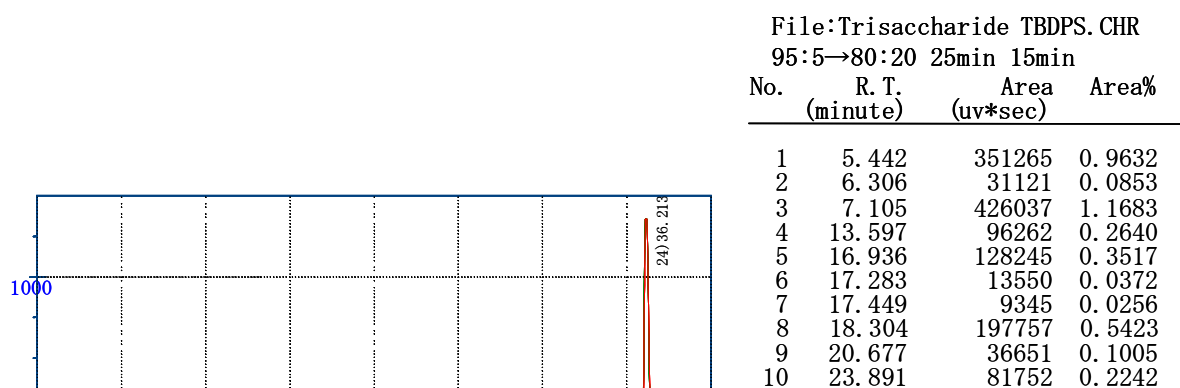



Fig.2 HPLC profile of **compound 3b**

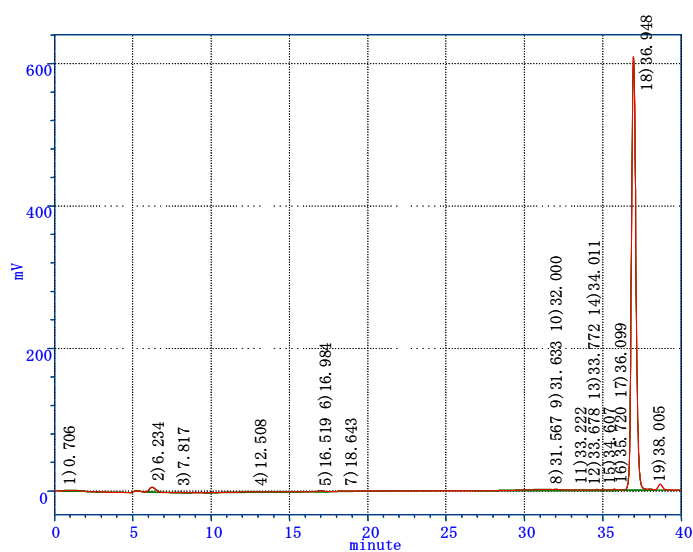

File:TetrasaccharideTBDPS. CHR  
95:5→75:25 25min 30min

| No.   | R. T.<br>(minute) | Area<br>(uv*sec) | Area%   |
|-------|-------------------|------------------|---------|
| 1     | 0.706             | 79504            | 0.5952  |
| 2     | 6.234             | 206199           | 1.5438  |
| 3     | 7.817             | 11246            | 0.0842  |
| 4     | 12.508            | 61550            | 0.4608  |
| 5     | 16.519            | 65075            | 0.4872  |
| 6     | 16.984            | 36248            | 0.2714  |
| 7     | 18.643            | 26242            | 0.1965  |
| 8     | 31.567            | 189341           | 1.4176  |
| 9     | 31.633            | 16175            | 0.1211  |
| 10    | 32.000            | 95684            | 0.7164  |
| 11    | 33.222            | 29184            | 0.2185  |
| 12    | 33.678            | 1362             | 0.0102  |
| 13    | 33.772            | 2004             | 0.0150  |
| 14    | 34.011            | 14095            | 0.1055  |
| 15    | 34.607            | 43294            | 0.3241  |
| 16    | 35.720            | 67757            | 0.5073  |
| 17    | 36.099            | 11629            | 0.0871  |
| 18    | 36.948            | 12356590         | 92.5110 |
| 19    | 38.005            | 43702            | 0.3272  |
| Total |                   | 13356881         |         |

Fig.3 HPLC profile of **compound 3c**

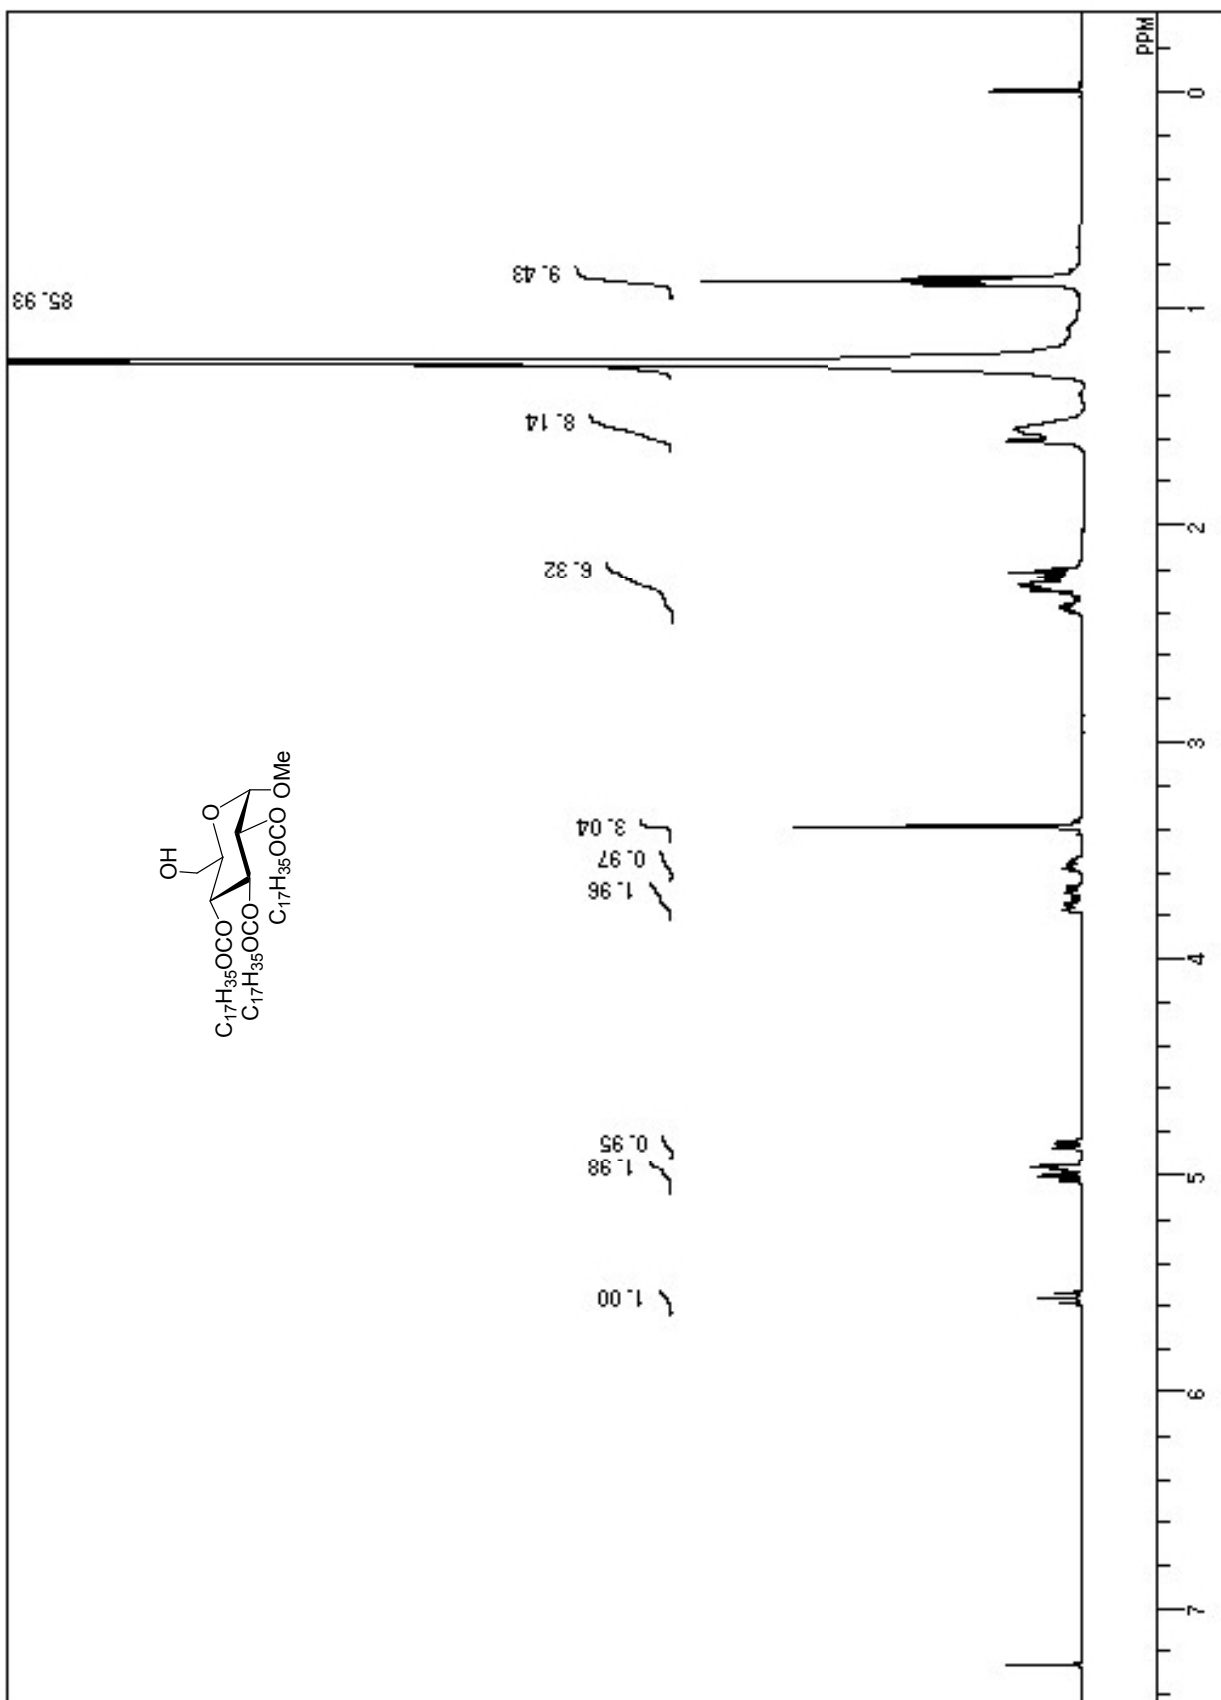

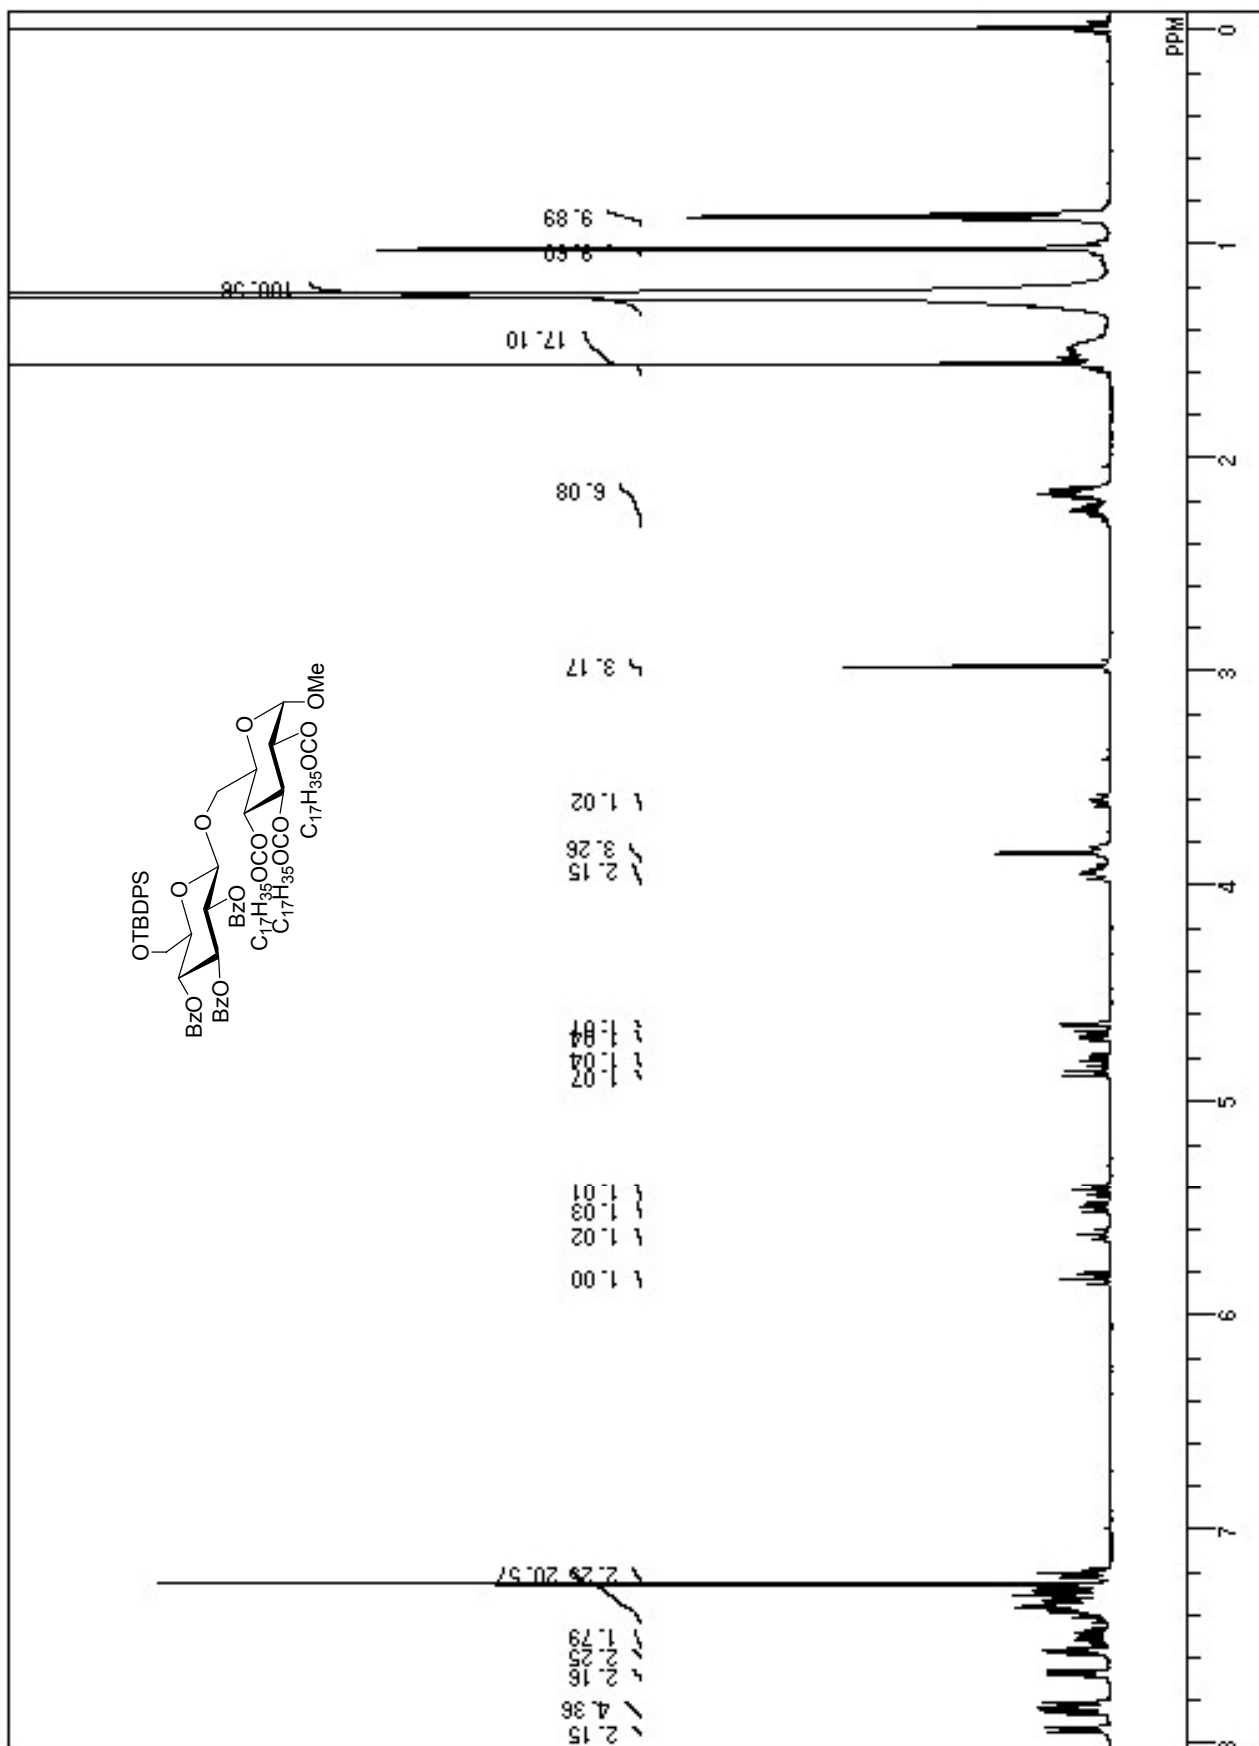

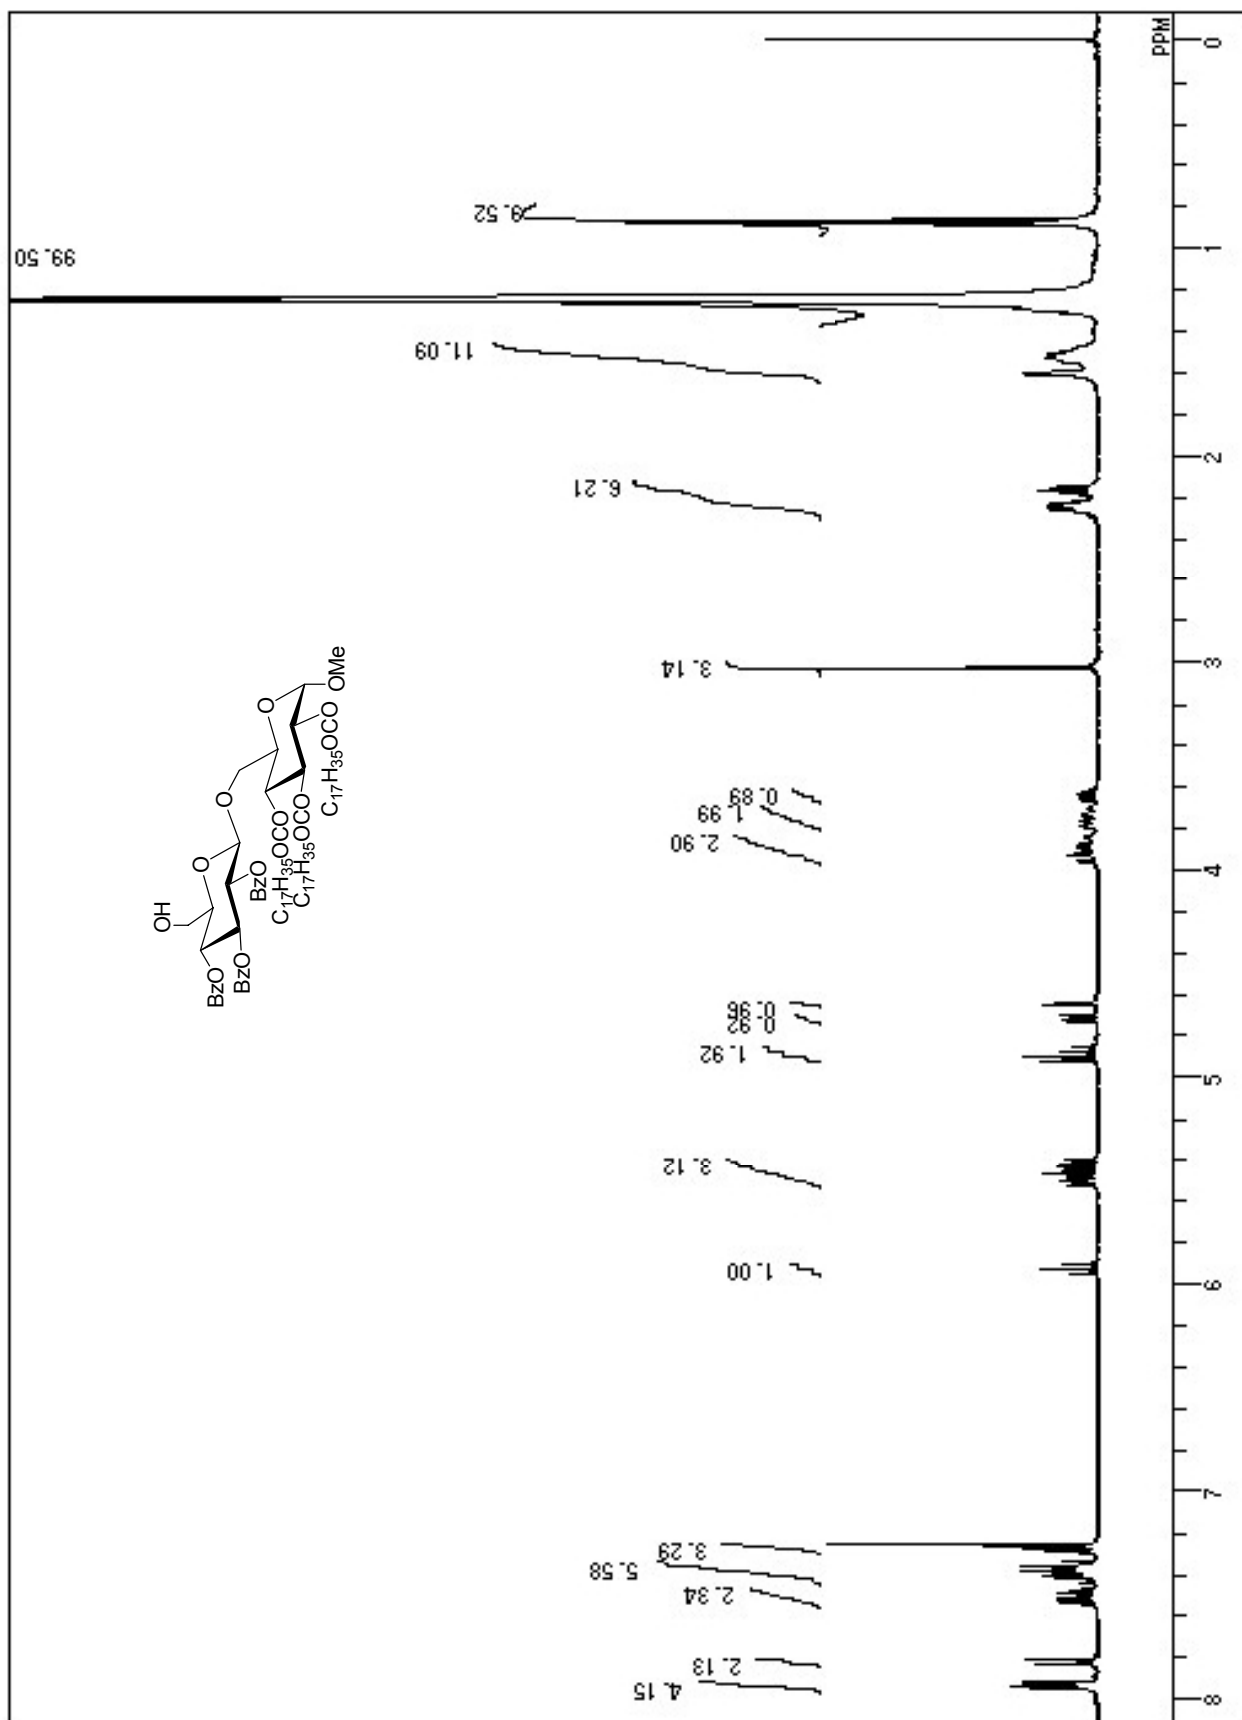

Supplementary Material (ESI) for Chemical Communications

This journal is (c) The Royal Society of Chemistry 2008

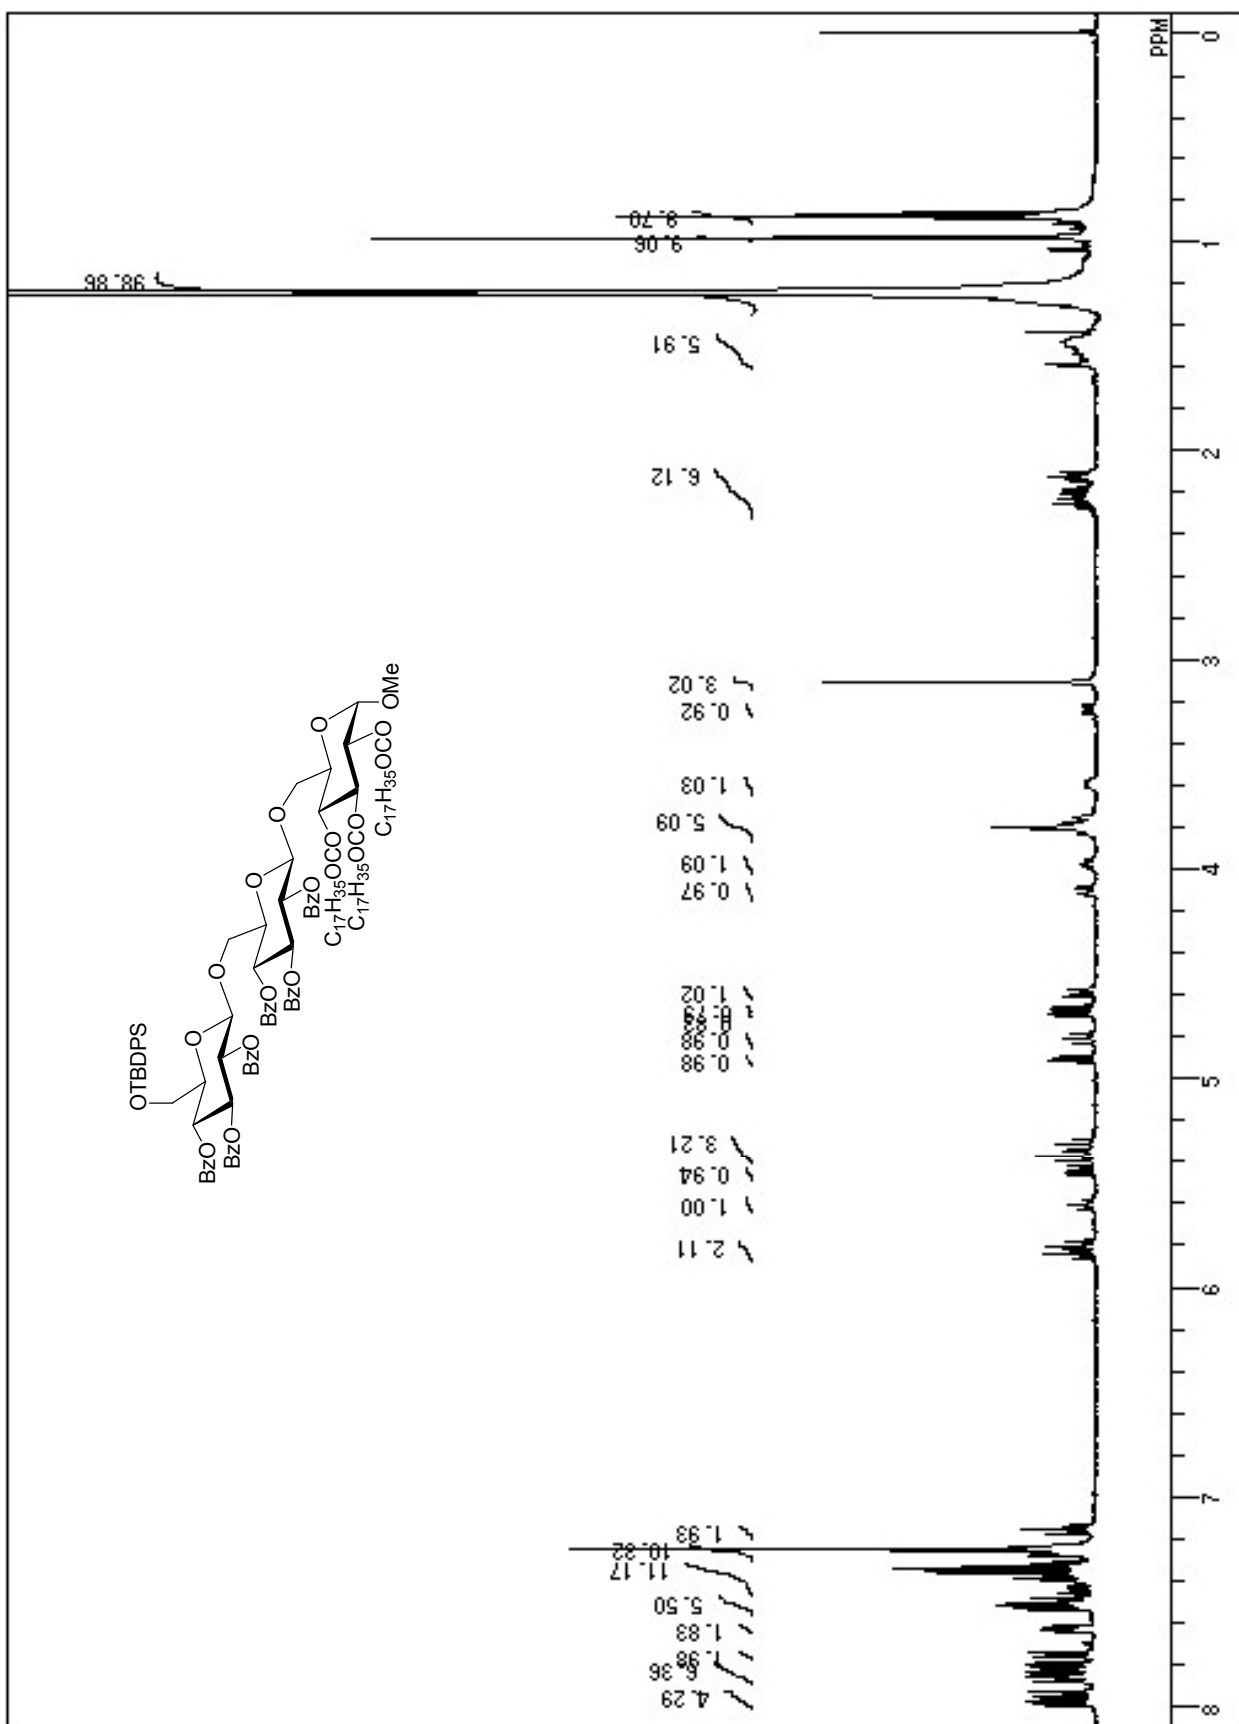

Supplementary Material (ESI) for Chemical Communications

This journal is (c) The Royal Society of Chemistry 2008

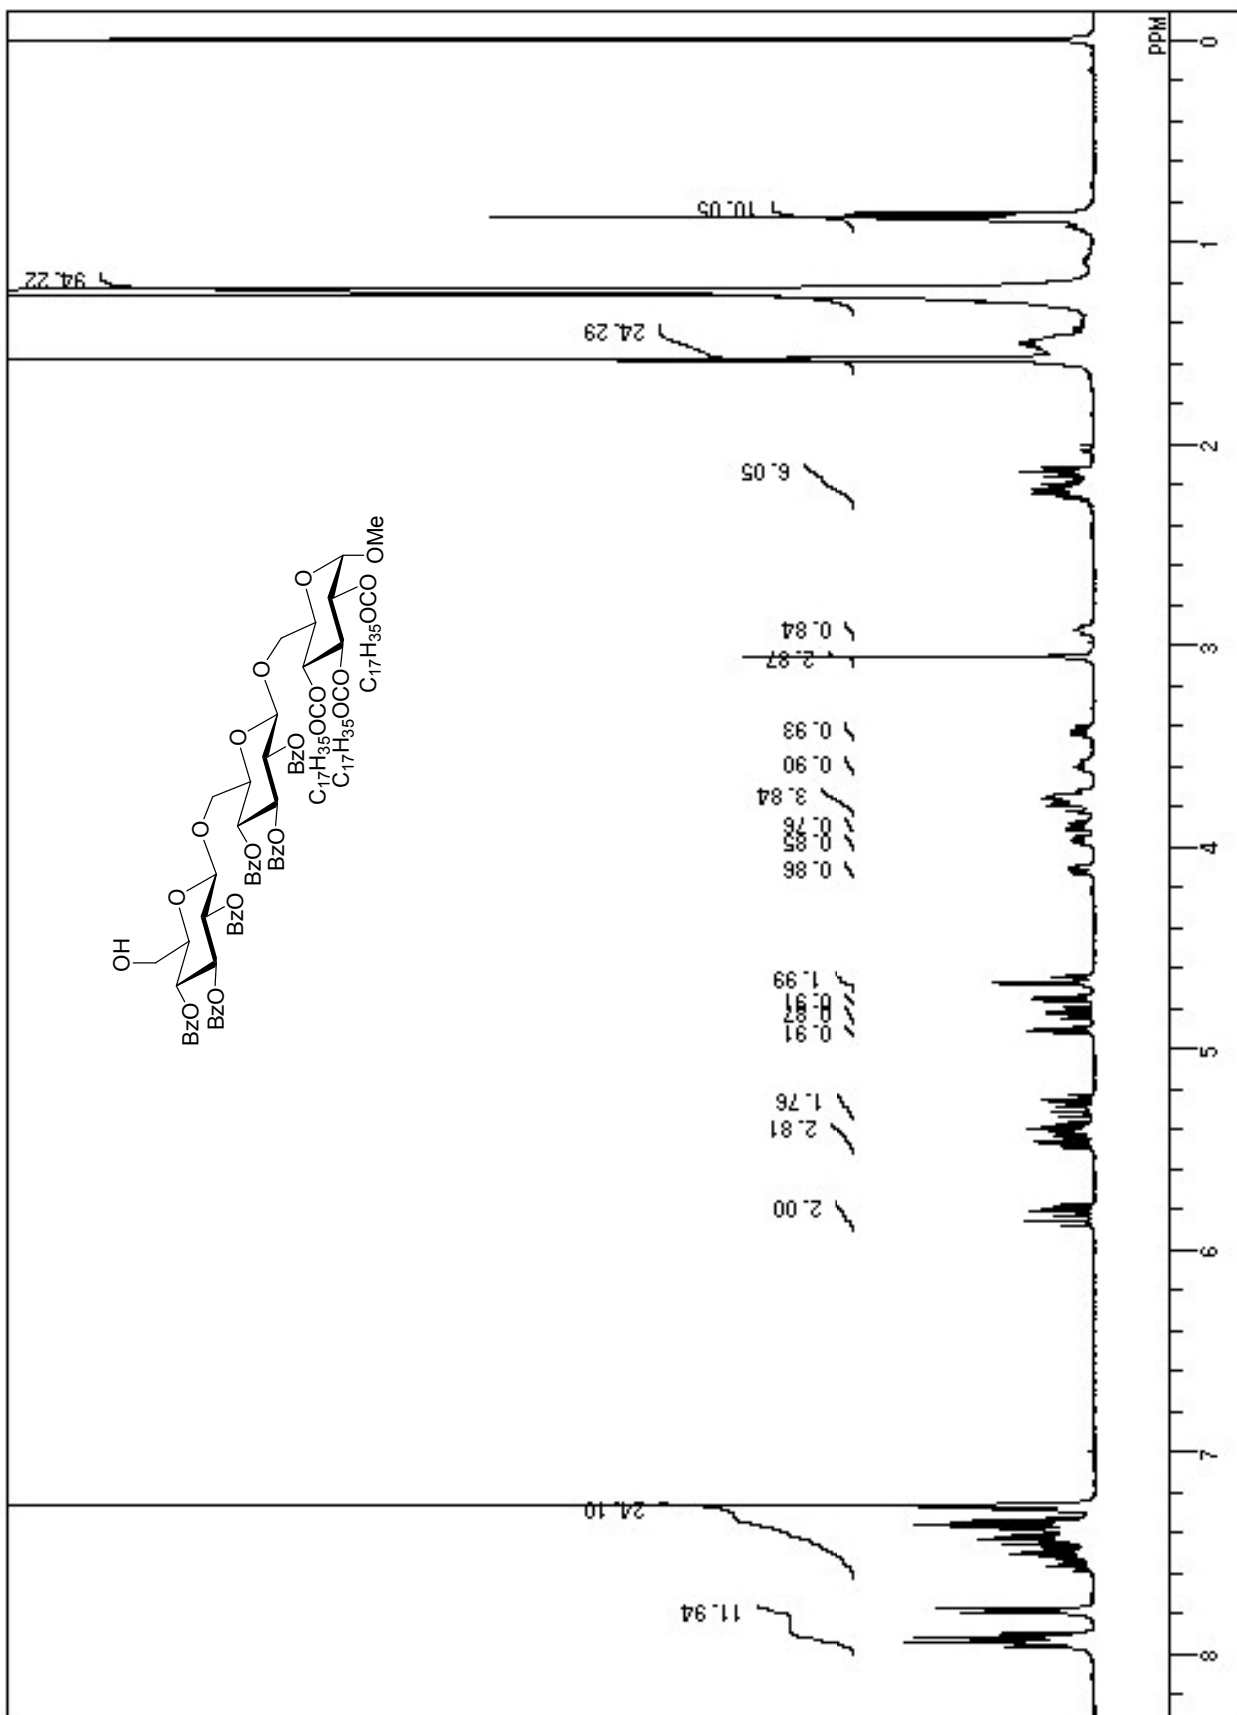



Supplementary Material (ESI) for Chemical Communications

This journal is (c) The Royal Society of Chemistry 2008

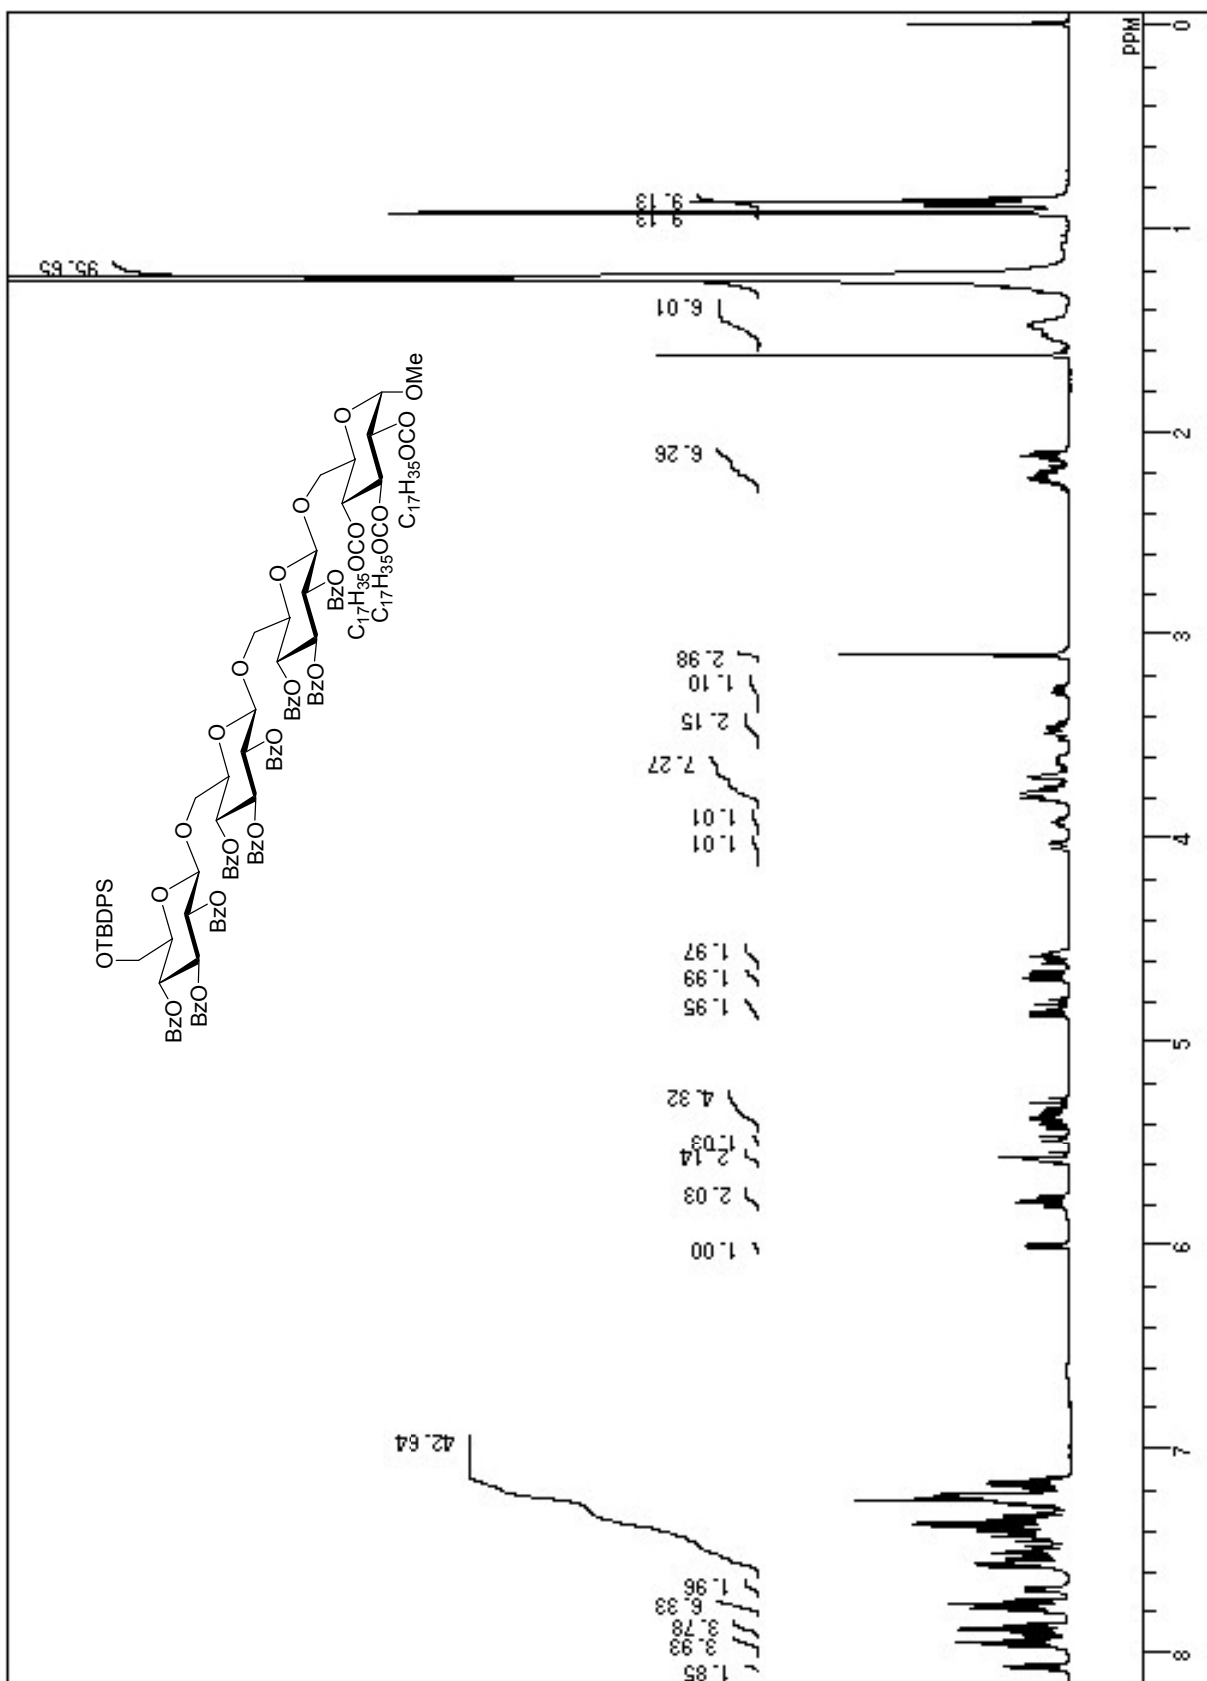

Supplement: b717446b.pdf [file b717446b.pdf]
